# Supplementary material for: The Combined Beneficial Effects of Postbiotic Butyrate on Active Vitamin D3-Orchestrated Innate Immunity to Salmonella Colitis
Source: MDPI journal article supplement (doi:10.3390/biomedicines9101296), 2021-09-22
Supplement: s1 [file s1]

Table S1: The pathological scores with mean and standard error for each group.

|          | Submucosal edema | PMN infiltration | Goblet cells number | Epithelial integrity | Total       |
|----------|------------------|------------------|---------------------|----------------------|-------------|
| NA       | 0.28 ± 0.18      | 0.00 ± 0.00      | 1.35 ± 0.12         | 0.31 ± 0.08          | 1.95 ± 0.25 |
| VD       | 1.86 ± 0.14      | 1.48 ± 0.12      | 2.70 ± 0.25         | 2.75 ± 0.22          | 8.79 ± 0.70 |
| ST       | 2.00 ± 0.00      | 1.70 ± 0.09      | 2.69 ± 0.17         | 2.90 ± 0.05          | 9.29 ± 0.31 |
| BT20     | 2.00 ± 0.00      | 1.53 ± 0.14      | 2.31 ± 0.28         | 2.60 ± 0.20          | 8.45 ± 0.53 |
| VD+BT20  | 1.71 ± 0.18      | 1.48 ± 0.15      | 1.76 ± 0.13         | 2.42 ± 0.26          | 7.38 ± 0.63 |
| BT100    | 1.86 ± 0.14      | 1.51 ± 0.13      | 2.44 ± 0.27         | 2.64 ± 0.17          | 8.45 ± 0.54 |
| VD+BT100 | 1.71 ± 0.18      | 1.34 ± 0.14      | 1.70 ± 0.19         | 2.29 ± 0.33          | 7.05 ± 0.80 |

\*NA (Open control), ST (SL1344 infected), VD (vitamin D3 and SL1344 infected), BT20 (Low dose butyrate and SL1344 infected), VD+BT20 (vitamin D3 plus Low dose butyrate and SL1344 infected), BT100 (High dose butyrate and SL1344 infected), VD+BT100 (vitamin D3 plus high dose butyrate and SL1344 infected) (each group, n = 7)
